# Supplementary material
Source: PubMed Central journal article supplement (PMC4559509)

**Supplemental Table 1** – Spearman’s rank correlation between sCD14 plasma concentration and baseline characteristics

| Variable                      | $\rho$ | $P$     |
|-------------------------------|--------|---------|
| Age                           | 0.13   | 0.003   |
| Gender (female vs. male)      | 0.12   | 0.008   |
| Prior CVD                     | 0.12   | 0.006   |
| Diabetes mellitus             | 0.05   | 0.25    |
| Current smoker                | 0.03   | 0.50    |
| Body mass index               | - 0.09 | 0.05    |
| Systolic blood pressure       | 0.03   | 0.51    |
| Diastolic blood pressure      | - 0.07 | 0.14    |
| Hemoglobin                    | - 0.31 | < 0.001 |
| Albumin                       | - 0.10 | 0.03    |
| C-reactive protein            | 0.20   | < 0.001 |
| Cholesterol                   | - 0.05 | 0.27    |
| LDL                           | - 0.09 | 0.04    |
| HDL                           | 0.005  | 0.91    |
| Calcium                       | - 0.02 | 0.65    |
| Phosphate                     | 0.22   | < 0.001 |
| Parathormone                  | 0.18   | < 0.001 |
| Creatinine                    | 0.30   | < 0.001 |
| eGFR                          | - 0.34 | < 0.001 |
| 24h proteinuria               | 0.12   | 0.02    |
| Therapy with ACEI/ARB         | - 0.01 | 0.78    |
| Therapy with statin           | 0.05   | 0.25    |
| Therapy with 25-OH-vitamin D  | 0.12   | 0.009   |
| Therapy with phosphate binder | 0.14   | 0.002   |
| Endotoxin (EU/ml)             | - 0.06 | 0.20    |

CVD, cardiovascular disease; LDL, low-density lipoprotein; HDL, high-density lipoprotein; eGFR, estimated glomerular filtration rate; ACEI, angiotensin-converting enzyme inhibitor; ARB, angiotensin receptor blocker; ; 25-OH-vitamin D, 25-hydroxy-vitamine D; sCD14, soluble CD14.

**Supplemental Table 2** – Multivariate regression analysis: Factors associated with sCD14 plasma concentration (Ln)

| Variable                | Unit                      | $\beta$     | $P$     |
|-------------------------|---------------------------|-------------|---------|
| Body mass index         | kg/m <sup>2</sup>         | -0.005      | 0.008   |
| Hemoglobin              | g/dL                      | -0.02       | < 0.001 |
| C-reactive protein (Ln) | mg/L                      | 0.04        | < 0.001 |
| eGFR (Ln)               | ml/min/1.73m <sup>2</sup> | -0.09       | < 0.001 |
|                         |                           | Model $R^2$ | 0.18    |

**Supplemental Table 3 – Cause of death**

| Cause (n = 53) | N (%)      |
|----------------|------------|
| Cardiovascular | 17 (32.1%) |
| Malignancy     | 15 (28.3%) |
| Infectious     | 3 (5.7%)   |
| Other          | 18 (34.0%) |

**Supplemental Table 4 – Cardiovascular events**

| Events (n = 78)                   | N (%)      |
|-----------------------------------|------------|
| <i>Non-fatal</i>                  | 66 (84.6%) |
| Cardiac                           | 30 (38.5%) |
| New onset angina, conservative    | 11 (14.1%) |
| New onset angina, invasive        | 6 (7.7%)   |
| Acute myocardial infarction       | 10 (12.8%) |
| Ventricular arrhythmia            | 3 (3.8%)   |
| Ischemic cerebrovascular accident | 5 (6.4%)   |
| Peripheral arterial disease       | 31 (39.7%) |
| <i>Fatal</i>                      | 12 (15.4%) |

**Supplemental Figure 1:** CD14 is a Pattern Recognition Receptor (PRR) that binds to lipopolysaccharide (LPS). It is expressed on most innate immune response cells and exists either in an anchored membrane form (mCD14) or in a circulating soluble form (sCD14). The latter is a 43-53 kD glycoprotein that derives from either protease-mediated membrane CD14 shedding or possibly liver synthesis. sCD14 can activate cells participate in cell activation by facilitating transfer of LPS to mCD14 or by transferring LPS to toll-like receptor 4/ MD-2 complex on cells that do not express membrane-bound CD14.

LBP, lipopolysaccharide binding protein; NF- $\kappa$ B, Nuclear factor- $\kappa$ B; HDL, high density lipoprotein.

**Supplemental Figure 2:** Flow chart demonstrating patient screening and inclusion.

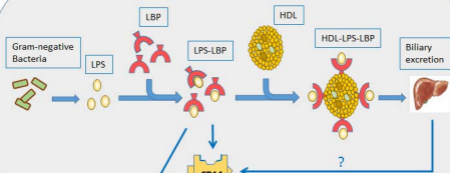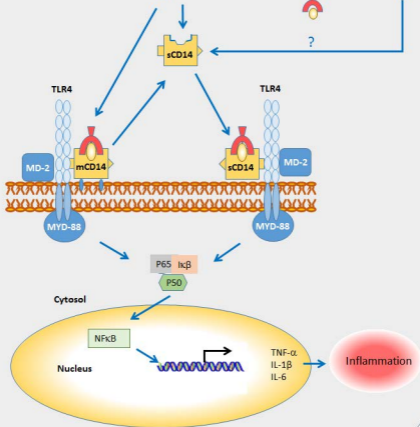

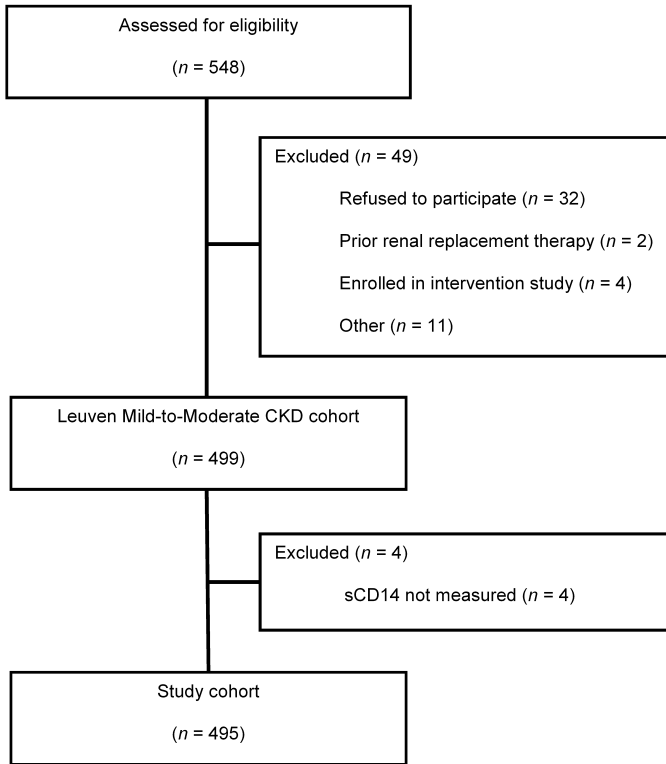

Supplement: CJN.03100315_CJN03100315SupplementaryData.pdf [file CJN.03100315_CJN03100315SupplementaryData.pdf]
